1 Screening of FDA-approved Drugs and Identification of Novel Lassa Virus Entry

2 Inhibitors

3 Peilin Wang <sup>a,c</sup>, Yang Liu <sup>c</sup>, Guangshun Zhang <sup>b</sup>, Shaobo Wang <sup>a,c\*</sup>, Jiao Guo <sup>a,c</sup>,

4 Junyuan Cao <sup>a,c</sup>, Xiaoying Jia <sup>a,c</sup>, Leike Zhang <sup>a,c</sup>, Gengfu Xiao <sup>a,c</sup>, Wei Wang <sup>a,c#</sup>

5 University of the Chinese Academy of Sciences, Beijing, China <sup>a</sup>

6 College of Pharmacy and State Key Laboratory of Medicinal Chemical Biology,

7 Nankai University, Tianjin, China <sup>b</sup>

8 State Key Laboratory of Virology, Wuhan Institute of Virology, Chinese Academy of

9 Sciences, Wuhan, China <sup>c</sup>

10

11 **Running Title:** Drug Repurposing for LASV entry

12 **Key Words:** Lassa virus (LASV), glycoprotein complex (GPC), lacidipine,

13 phenothrin, membrane fusion

14 **Word Count (Abstract):** 221

15 **Word Count (Text):** 4,034

16 #Address correspondence to Wei Wang, [wangwei@wh.iov.cn](mailto:wangwei@wh.iov.cn)

17 \*Present address: Shaobo Wang, Department of Pediatrics, University of California

18 San Diego, La Jolla, CA 92093, USA

19 (Part of this study was presented in 2017 at the 17th International Congress of

20 Virology, Singapore.)

21

22 **ABSTRACT** Lassa virus (LASV) belongs to the *Mammarenavirus* genus (family  
23 *Arenaviridae*) and causes severe hemorrhagic fever in humans. At present, there are  
24 no Food and Drug Administration (FDA)-approved drugs or vaccines specific for  
25 LASV. Herein, high-throughput screening of an FDA-approved drug library was  
26 performed against LASV entry using a pseudo-type virus enveloping LASV  
27 glycoproteins. Two hit drugs, lacidipine and phenothrin, were identified as LASV  
28 entry inhibitors in the micromolar range. A mechanistic study revealed that both drugs  
29 inhibited LASV entry by blocking low-pH-induced membrane fusion. Moreover,  
30 lacidipine irreversibly bound to the LASV glycoprotein complex (GPC), resulting in  
31 virucidal activity. Adaptive mutant analyses demonstrated that replacement of T40,  
32 located in the ectodomain of the stable-signal peptide (SSP), with lysine (K) conferred  
33 LASV resistance to lacidipine without apparent loss of the viral growth profile.  
34 Furthermore, lacidipine showed antiviral activity and specificity against both LASV  
35 and the Guanarito virus (GTOV), which is also a category A new world arenavirus.  
36 Drug-resistant variants indicate that the V36M in ectodomain of SSP mutant and  
37 V436A in the transmembrane domain of GP2 mutant conferred GTOV resistance to  
38 lacidipine, suggesting that lacidipine might act via a novel mechanism other than  
39 calcium inhibition. This study shows that both lacidipine and phenothrin are  
40 candidates for LASV therapy, and the membrane-proximal external region of the GPC  
41 might provide an entry-targeted platform for inhibitors.

42

43 **IMPORTANCE** Currently, there is no approved therapy to treat Lassa fever;

44 therefore, repurposing of approved drugs will accelerate the development of a  
45 therapeutic stratagem. In this study, we screened an FDA-approved library of drugs  
46 and identified two drugs, lacidipine and phenothrin, which inhibit Lassa virus entry by  
47 blocking low-pH-induced membrane fusion. Additionally, both drugs extended their  
48 inhibition against the entry of Guanarito virus, and the viral targets of lacidipine were  
49 identified.

50

51 Lassa virus (LASV) is an enveloped, negative-sense, bi-segmented RNA virus  
52 belonging to the *Mammarenavirus* genus (family *Arenaviridae*) (1).

53 Mammarenaviruses consist of 35 unique species currently recognized by the  
54 International Committee on Taxonomy of Viruses. The original classification of  
55 mammarenaviruses, based mainly on virus antigenic properties; serological, genetic,  
56 and geographical relationships; and the rodent host, divided them into new world  
57 (NW) and old world (OW) mammarenaviruses (2). The OW Lassa virus and some  
58 NW mammarenaviruses, including the Junín virus (JUNV), Machupo virus (MACV),  
59 Guanarito virus (GTOV), and Sabiá virus (SABV), are known to cause severe  
60 hemorrhagic fever and are listed as biosafety level (BSL) 4 agents (3, 4). LASV  
61 infections cause about 300,000 cases of Lassa fever per year, and the mortality rate in  
62 hospitals is reported to be as high as 65–70% (5). At the beginning of this year, a  
63 Lassa fever outbreak was reported in Nigeria. From January 1 to March 18, 2018, 376  
64 confirmed cases and 95 deaths have been reported (6).

65 The LASV RNA genome encodes the viral polymerase, nucleoprotein, matrix protein

66 (Z), and glycoprotein complex (GPC). The GPC is synthesized as an inactive  
67 polypeptide and cleaved twice by the signal peptidase and cellular protease subtilisin  
68 kexin isozyme-1/site-1 protease, yielding the retained stable-signal peptide (SSP), the  
69 receptor-binding subunit GP1, and the membrane fusion subunit GP2 (7-10). The  
70 highly conserved arenavirus SSPs contain 58 amino acids that span the membrane  
71 twice, with 8 amino acids in the ectodomain, playing essential roles in GPC  
72 maturation and downstream functions (11-17). LASV utilizes  $\alpha$ -dystroglycan ( $\alpha$ -DG)  
73 as a primary receptor, and successful infections require the receptor switch to  
74 lysosome-associated membrane protein 1 (18-20).

75 To date, no vaccines or specific antiviral agents against LASV are available. Therapy  
76 strategies are limited to the administration of ribavirin in the early course of the illness  
77 (21). To address this issue, we screened an FDA-approved drug library of 1018  
78 compounds. The approved drugs have been intensively investigated for safety,  
79 pharmacokinetics, and targets; therefore, screening approved drugs for repurposing  
80 will increase the speed of discovery and development for treatment (22, 23). Drugs  
81 targeting viral entry can block replication and spread at an early stage. Since studies  
82 of LASV require BSL-4 equipment, we utilized a LASV GPC pseudo-type vesicular  
83 stomatitis virus (VSV) containing a *Renilla* luciferase (Rluc) reporter gene for  
84 high-throughput screening (HTS) of LASV entry inhibitors, which can be performed  
85 in a BSL-2 facility. After three rounds of screening, lacidipine and phenothrin were  
86 identified to be highly effective against LASV entry. The hit drugs identified in this  
87 study offer potential new therapies to treat arenavirus infections and disease.

88

## 89 RESULTS

90 **Screening of an FDA-Approved Drug Library for Inhibitors of LASV Entry.** To

91 perform high-throughput screening (HTS) under BSL-2 conditions, we generated a

92 pseudo-type virus bearing the LASV GPC (designated LASVpv) for HTS of entry

93 inhibitors (24). The number of genomic RNA copies of LASVpv was determined to

94 be  $1 \times 10^7$  copies/ml by using a standard curve generated with plasmids carrying the

95 VSV $\Delta$ G-Rluc. The HTS assay conditions, including the seeding cell density and

96 LASVpv infective dose, were optimized at  $1 \times 10^4$  cells and  $1 \times 10^2$  copies per

97 96-well plate, respectively. Under the optimized conditions, signal-to-basal (S/B) ratio,

98 coefficient of variation (CV), and Z' factor were 41770, 11.9%, and 0.62, respectively,

99 demonstrating that the assay was promising for large-scale screening of inhibitors.

100 The HTS schematic is depicted in Fig. 1A. Inhibitors were defined as primer

101 candidates with inhibition  $> 50\%$  and no apparent cytotoxicity in duplicate wells at a

102 concentration of 10  $\mu$ M. Of the 1018 tested compounds, 52 (5.11%) were considered

103 primer candidates. A screening to reconfirm the results was then carried out using

104 these primer candidates over a broader concentration range (3.125 to 50.0  $\mu$ M). Seven

105 compounds (0.69%) were selected based on their concentration-dependent inhibitory

106 effects and a cell viability  $> 80\%$ . Subsequently, these 7 compounds were subjected to

107 counter-screening to rule out inhibitors of VSV genome replication and Rluc. Using

108 these criteria, 2 hits, lacidipine and phenothrin, were selected with specific inhibition

109 against LASV GPC activity, while the other 5 compounds were eliminated (Fig. 1B).

110 Lacidipine is a dihydropyridine voltage-gated  $\text{Ca}^{2+}$  channel antagonist, while  
111 phenothrin is a synthetic pyrethroid used for aerosol insecticides. We evaluated the 50%  
112 inhibitory concentration ( $\text{IC}_{50}$ ) and 50% cytotoxic concentration ( $\text{CC}_{50}$ ) of both hit  
113 drugs. Both lacidipine and phenothrin exhibited dose-dependent inhibition of  
114 LASVpv infections. Additionally, both drugs inhibited LASVpv infection in the A549  
115 human epithelial cell line; epithelial cells are important targets of infection *in vivo*,  
116 suggesting these drugs are potentially useful in the treatment of human infections (Fig.  
117 1C and D). The selective index (SI, the ratio of the  $\text{CC}_{50}$  to the  $\text{IC}_{50}$ ) for lacidipine  
118 was 55.4, while that for phenothrin was  $> 75.5$  (Fig. 1E). The  $\text{CC}_{50}$  values for the 2 hit  
119 drugs were similar to those previously published for diverse cell systems; however,  
120 they were determined using different toxicity assays (25). To validate the antiviral  
121 effects, lacidipine and phenothrin were purchased from other commercial sources and  
122 tested; the cytotoxic and antiviral effects were similar to the results of our primary  
123 screening.

#### 124 **Lacidipine and Phenothrin Inhibited GPC-mediated Membrane Fusion.**

125 Arenavirus GPCs have a unique structure in which the cleaved SSP is retained and  
126 non-covalently associates with GP2; many arenavirus entry inhibitors have been  
127 shown to bind with and stabilize the prefusion forms of GPC to prevent membrane  
128 fusion (26-28); therefore, we asked whether the 2 hit drugs act via a similar  
129 mechanism. To address this, 293T cells transfected with GPC were incubated with  
130 either drug and subjected to a low-pH pulse to promote fusion. As shown in Fig. 2A, a  
131 low pH in the GPC-transfected cells induced obvious membrane fusion, whereas a

132 neutral pH had no effect. Both drugs inhibited syncytium formation at all tested  
133 concentrations, suggesting that both drugs inhibit GPC conformational changes  
134 induced by an acidic environment.

135 To further quantitatively evaluate the inhibitory activities, fusion efficacy was  
136 determined using a dual-luciferase assay. As shown in Fig. 2B, the maximum  
137 inhibitory rates for lacidipine and phenothrin were 42.4% and 81.2%, respectively, at  
138 the range of concentrations tested. Notably, phenothrin exhibited great activity (~80%)  
139 against GPC-mediated membrane fusion even at the lowest concentration tested (12.5  
140  $\mu\text{M}$ ). Together, these results show that both drugs, especially phenothrin, prominently  
141 inhibit GPC-mediated membrane fusion.

142 **Lacidipine Irreversibly Binds to GPC.** Lacidipine and phenothrin inhibited  
143 GPC-mediated membrane fusion; therefore, we asked whether the drugs irreversibly  
144 bind to GPC and prevent conformational changes. To test this, we conducted a  
145 virucidal assay to investigate the binding ability of the hit drugs to native GPC.

146 LASVpv was mixed with drugs for 1 h; the mixture was then diluted 200-fold and  
147 added to the cells for 1 h. As shown in Fig. 3A, luciferase activity was not suppressed  
148 in the phenothrin group, indicating that phenothrin did not irreversibly bind to the  
149 neutral-pH forms of GPC (29). However, it is possible that phenothrin binds to a  
150 structural GPC intermediate resulting from the low pH. A reduction > 70% was  
151 observed in the lacidipine group, suggesting that lacidipine irreversibly interacts with  
152 the pre-fusion conformation of GPC and inhibits LASV entry.

153 We next investigated the inhibitory effects of the drugs on binding, which is

154 initialized when GP1, the receptor binding subunit, recognizes the primary receptor  
155  $\alpha$ -DG (18). Binding efficacy was evaluated in the absence and presence of the drugs,  
156 and no significant decrease in the number of LASVpv particles bound to the cell  
157 surface at 4°C was observed in either drug-treated group (Fig. 3B), suggesting that  
158 neither drug interferes with the receptor binding subunit GP1 (38, 39).

159 To further confirm drug mechanisms, we studied the inhibition kinetics of lacidipine  
160 and phenothrin. Pretreatment of cells with lacidipine or phenothrin sharply decreased  
161 LASVpv infection even when removed at 30 min post-infection. The addition of  
162 drugs 30 min post-infection resulted in a mild inhibitory effect, while the addition of  
163 drugs 1 h post-infection had no effect, suggesting that membrane fusion occurred  
164 within 1 h; these results agree with previously published results (30, 31) confirming  
165 that the early stage of infection is the sensitive drug phase.

166 **SSP T40K Mutation Confers Resistance to Lacidipine.** To identify the viral target  
167 of the drugs, we selected an adaptive mutant virus by serially passaging LASVrv in  
168 the presence of 10  $\mu$ M lacidipine and 25  $\mu$ M phenothrin, respectively. Parallel  
169 passaging of LASVrv in dimethyl sulfoxide (DMSO) was used as a control. In the  
170 lacidipine-treated group, robust resistance was detected after 12 rounds of passaging.  
171 When viruses were treated with 10  $\mu$ M lacidipine, the viral titer after 12 rounds of  
172 passaging was about 100-fold higher than that in the wild type (WT) virus (Fig. 4A).  
173 The lacidipine-resistant virus isolate was plaque purified and sequenced for the entire  
174 glycoprotein precursor GPC region. An amino acid substitution was observed in the  
175 isolated clone, but markedly absent in the DMSO-treated virus, resulting in a



176 threonine (T) to lysine (K) switch at amino acid position 40 in the ectodomain of SSP  
177 (i.e. the last position of the SSP ectodomain) (Fig. 4B). Notably, in the  
178 phenothrin-treated group, no obvious improvement in resistance was detected after 20  
179 rounds of passaging, suggesting that phenothrin was less prone to induce adaptive  
180 mutations in the glycoprotein.

181 The arenavirus SSP, unlike other enveloped viruses, is unusually long and retains the  
182 GPC as a vital subunit, playing an essential role in glycoprotein maturation and viral  
183 infectivity (12, 16, 32). The 58-amino acid SSP contains two hydrophobic domains  
184 linked by an 8-amino acid ectodomain loop that interacts with the proximal- and  
185 trans-membrane region of GP2 to confer sensitivity of fusion inhibitors (26, 33, 34).

186 To confirm that the T40K mutation conferred lacidipine resistance and to investigate  
187 the role of T40 in SSP function and lacidipine inhibition of LASV entry, we produced  
188 recombinant viruses with T40K, T40R, T40D, or T40A mutations by introducing the  
189 desired mutations into the GPC gene and generating mutant viruses. To investigate the  
190 biological properties of the mutant viruses, we first examined the growth kinetics of  
191 the rescued viruses. As shown in Fig. 4C, all the viruses caused an accumulation of  
192 infectious virions that reached the highest titer at 48 h p.i. Infection of T40K mutant  
193 viruses resulted in similar growth curves to those of the WT virus, while T40R and  
194 T40D mutants produced less virus after 18 to 36 h. Plaque morphology analyses  
195 revealed that the T40K plaques were similar to the WT plaques, whereas T40R and  
196 T40D plaques were smaller, and T40A plaques were mid-range. These results  
197 suggested that the infectivity of SSP T40R and T40D mutant viruses is milder than

198 that of the WT virus, and position 40 in SSP was tolerable for K.

199 We next investigated sensitivity of the four mutant viruses to lacidipine. As shown in  
200 Fig. 4D, the T40K, T40R, and T40D mutant viruses conferred resistance to lacidipine,  
201 which efficiently inhibited LASVrv WT infection at a concentration of 10  $\mu$ M and  
202 reduced viral yields by 3 log units. In contrast, T40K, T40R, and T40D mutant viruses  
203 were resistant to lacidipine, with the viral titer decreasing slightly less than 1 log unit;  
204 the T40A mutant virus showed no resistance to lacidipine.

205 Taken together, these results suggest that the T40 mutant was not only critical in  
206 conferring lacidipine sensitivity, but also important for LASV infectivity. Substitution  
207 of T with K conferred resistance to lacidipine without apparent loss of growth, while  
208 substitution with a small nonpolar amino acid (A, alanine) did not affect lacidipine  
209 sensitivity. Other positively charged amino acids (R, arginine) or negatively charged  
210 amino acids (D, aspartic acid) resulted in the mutant viruses replicating more slowly  
211 than the WT virus.

212 **Lacidipine Affects Entry of Other Arenaviruses.** T40 is conserved in OW viruses,  
213 except for Lujo virus (LUJV), whereas K40 is similarly conserved (K or R) in NW  
214 viruses; therefore, we investigated the effects of lacidipine on the entry of other  
215 pathogenic arenaviruses, such as OW viruses (including lymphocytic  
216 choriomeningitis virus (LCMV), LUJV, and the closely related Mopeia virus (MOPV)  
217 and NW viruses (including JUNV, MACV, GTOV, SABV, and Chandipura virus  
218 (CHPV) using a pseudo-type virus. Vero cells were treated with vehicle (DMSO) or  
219 lacidipine (1.5625 to 25  $\mu$ M) starting 1 h before infection (multiplicity of infection

220 [MOI] = 0.01) to 1 h post-infection. At 23 h p.i., cell lysates were collected, and  
221 luciferase activity determined. As shown in Fig. 5A, all viruses mentioned above  
222 remained unaffected, except for GTOV and MOPV, which exhibited dose-dependent  
223 inhibition with an IC<sub>50</sub> of 6.2 and 4.8 μM, respectively. We also investigated the  
224 broad-spectrum antiviral activity of phenothrin, which dose-dependently inhibited the  
225 entry of GTOV, MOPV, and CHPV, with IC<sub>50</sub> values of 6.1, 8.3, and 8.0 μM,  
226 respectively. Phenothrin had a less powerful effect on the entry of JUNV, MACV, and  
227 SABV, since the percentage of inhibition was less than 50% at the highest tested  
228 concentration.

229 To further assess the role of lacidipine and phenothrin on other class I fusion proteins,  
230 we utilized pseudo-type Ebola virus (EBOV) and Marburg virus (MARV). It is  
231 important to note that neither lacidipine nor phenothrin treatment robustly inhibited  
232 the entry of EBOV and MARV (Fig. 6), indicating a lacidipine- or phenothrin-related  
233 interaction with GPC of LASV and GTOV.

234 **Selection of Lacidipine-resistant GTOVrv.** GTOV possesses a K at position 40 of  
235 the SSP; therefore, we suggest that an amino acid other than K40 contributed to the  
236 sensitivity of GTOV to lacidipine. We further determined the viral target by selecting  
237 the adaptive mutant virus by serially passaging GTOVrv in the presence of 10 μM  
238 lacidipine. After 15 rounds, 2 amino acid substitutions, V36M in the ectodomain of  
239 SSP and V436A in the transmembrane domain of GP2, were observed in the resistant  
240 virus (Fig. 6A). To investigate the functional significance of these residues, a  
241 pseudo-type GTOV containing the mutants was used to evaluate lacidipine sensitivity.

242 GTOV was much less sensitive when either the V36M or V436A mutant was  
243 generated, and lacidipine sensitivity was further reduced when both sites were  
244 changed (Fig. 6B). As V36 is similarly conserved in NW pathogenic viruses, we  
245 reasoned that residues other than these selective mutations contributed to the  
246 sensitivity of LASV and GTOV to lacidipine.

247

## 248 **DISCUSSION**

249 In this report, we screened an FDA-approved drug library and identified 2 hit drugs,  
250 lacidipine and phenothrin, which prohibited the entry step of LASV infection.

251 Lacidipine is a lipophilic dihydropyridine calcium antagonist. Since calcium channels  
252 proved to be a therapeutic target for other enveloped viruses and calcium inhibitors  
253 showed promising effects on the entry of the closely-related JUNV and EBOV (22,  
254 42-44), we investigated whether lacidipine inhibits LASV entry by acting as a  
255 calcium inhibitor. To address this, we first reviewed all 22 calcium inhibitors included  
256 in the current FDA drug library; results showed that in addition to lacidipine, only two  
257 calcium inhibitors moderately inhibited LASV entry, including diltiazem and  
258 cilnidipine. Both drugs exerted less than 70% inhibition on LASVpv infection at the  
259 highest concentration tested (20  $\mu$ M), suggesting that calcium inhibitors do not  
260 effectively block LASV entry as observed for other enveloped viruses. Moreover,  
261 lacidipine irreversibly binds to LASV GPC and prohibits acid-pH-induced  
262 conformational changes of GPC and subsequent membrane fusion, supporting the  
263 speculation that under these conditions, lacidipine functions via a novel mechanism

264 rather than as a calcium inhibitor. To further elucidate the underlying mechanisms  
265 associated with prevention of LASV entry via lacidipine, we characterized the viral  
266 target of lacidipine by serially passaging LASVrv in the presence of lacidipine. In  
267 particular, we observed an amino acid substitution that resulted in a T-to-K switch at  
268 amino acid position 40 in the ectodomain of SSP. The SSP in the arenavirus GPC  
269 differs from that of conventional signal peptides as it: (i) is unusually long, containing  
270 58 amino acids; (ii) is retained after cleavage, and non-covalently associates with GP2  
271 and GP1 to constitute the GPC heterotrimer; and (iii) interacts with GP2, including  
272 the ecto-, transmembrane, and intracellular domains. As a result, the native structure  
273 of GPC is stabilized, participates in GPC-mediated activity, and provides an interface  
274 targeted by some entry inhibitors (8, 12, 16, 32-40). Among the 8 amino acid residues  
275 in the ectodomain of SSP, the absolutely conserved K33 and N37 are well studied and  
276 have proven to be essential in GPC maturation, fusion, and infectivity (12, 41). In the  
277 current study, we demonstrate that replacement of T40 with a charged amino acid (K,  
278 R, or D) confers LASV resistance to lacidipine, and position 40 is tolerable for K  
279 without detectable changes in LASVrv growth kinetics. These results suggest that T40  
280 together with lacidipine might interplay with the residues located in the  
281 membrane-proximal ectodomain of GP2, thus stabilizing the native structure of GPC.  
282 Although position 40 is tolerable for K, the stabilization interaction between T40 and  
283 lacidipine is collapsed by the replacement of K.  
284 As T40 and K40 are relatively conserved in OW and NW viruses, respectively, we  
285 further investigated the broad-spectrum inhibition of lacidipine against other

286 pathogenic mammarenaviruses. As anticipated, MOPV, the most phylogenetic-related  
287 virus, was sensitive to lacidipine with a similar  $IC_{50}$  value. Intriguingly, LCMV, the  
288 OW prototype possessing T at position 40, showed resistance to the drug. Moreover,  
289 GTOV, a NW mammarenavirus, was sensitive to lacidipine. Mapping the viral target  
290 of GTOV revealed two mutant sites, one in the ectodomain of SSP and the other in the  
291 transmembrane domain of GP2. These results suggest the SSP and  
292 proximal-membrane ectodomain of GP2 for arenavirus exhibit relatively high amino  
293 acid sequence conservation, and the overall GP1-GP2 structure of LASV aligns well  
294 with LCMV (42, 43); however, the interplay between SSP and GP2 involves a  
295 multiple sequential correlation and is not limited at the point-to-point sub interface.  
296 Lacidipine-sensitivity depends on accessibility of the interface to the drug as well as  
297 the stability of the drug-GPC complex.

298 We also identified phenothrin via HTS; phenothrin is a pyrethroid usually used in  
299 pesticide products and is effective at inhibiting LASV entry. We demonstrated that  
300 phenothrin has activity against MOPV, GTOV, and CHPV, with  $IC_{50}$  values lower  
301 than 10  $\mu$ M. The structure of phenothrin is similar to that of the LASV specific entry  
302 inhibitor ST-161, which uses a cyclopropyl *N*-acylhydrazone as a scaffold (26, 44). In  
303 our study, resistant viruses for LASV or GTOV were not successfully generated in the  
304 presence of phenothrin, suggesting this drug is less prone to induce adaptive  
305 mutations in the glycoprotein. In line with this, phenothrin exhibited little effect  
306 against LASVpv infection in the virucidal assay, indicating that phenothrin binds less  
307 tightly to GPC than lacidipine. Alternatively, phenothrin could bind to a

308 low-pH-induced intermediate conformation of GPC. By understanding the  
309 mechanisms of viral entry, inhibitors could be used to uncover novel drug targets,  
310 providing further insight into the pathogenesis of LASV.

311 In conclusion, the findings reported here provide novel insights into the molecular  
312 mechanisms underlying LASV entry and offer new and promising therapeutic  
313 possibilities for combating arenavirus infections.

314

## 315 **MATERIALS AND METHODS**

316 **Cells and Viruses.** BHK-21, HEK 293T, Vero, HeLa, and A549 cells were cultured in  
317 Dulbecco's modified Eagle's medium (HyClone, Logan, UT, USA) supplemented  
318 with 10% fetal bovine serum (Gibco, Grand Island, NY, USA). The pseudo-type VSV  
319 bearing the GPC of LASV (Josiah strain, Genbank HQ688673.1), LCMV (Armstrong  
320 strain, GenBank AY847350.1), LUJV (GenBank NC\_012776.1), MOPV (GenBank  
321 AY772170.1), GTOV (GenBank NC\_005077.1), JUNV (XJ13 strain, GenBank  
322 NC\_005081.1), MACV (Carvalho strain, GenBank NC\_005078.1), SABV (GenBank  
323 U41071.1), CHPV (GenBank NC\_010562.1), EBOV (Mayinga strain, GenBank:  
324 EU224440.2), and MARV (YP\_001531156.1) were generated as previously reported  
325 using the infectious clone for the VSV, Indiana serotype (kindly provided by  
326 Yoshiharu Matsuura, Osaka University, Osaka, Japan) (45-47). The recombinant VSV  
327 expressing the GPC of LASV and GTOV, in which the appropriate open reading  
328 frames for the GPC were cloned into the pVSV  $\Delta$  G-eGFP vectors (Plasmid #31842,  
329 addgene), were generated as described previously (48, 49). The pseudo-type and

330 recombinant viruses enveloped by LASV GPC are designated LASVpv and LASVrv,  
331 respectively.

332 **Optimization of HTS Assay Conditions.** Cell density and MOI were optimized for  
333 the HTS assay. Vero cells at different densities (2,500–12,500 cells per well) were  
334 infected with a MOI from 0.001 to 1 ( $10 \cdot 10^4$  copies per well). The appropriate cell  
335 density as well as the dose for LASVpv were selected by comparing the  
336 signal-to-basal ratio, the coefficients of variation, and Z' values under different  
337 conditions as previously described (29, 50). Methyl-beta-cyclodextrin and DMSO  
338 were used as a positive and negative control, respectively.

339 **HTS Assay of an FDA-Approved Compound Library.** A library of 1018  
340 FDA-approved drugs was purchased from Selleck Chemicals (Houston, TX, USA).  
341 Compounds were stored as 10 mM stock solutions in DMSO at -80 °C until use. The  
342 first round HTS was carried out as shown in Fig. 1A. Briefly, Vero cells were seeded  
343 at a density of  $1 \times 10^4$  cells per well in 96-well plates. After incubating overnight, cells  
344 were treated in duplicate with the compounds (10  $\mu$ M); 1 h later, cells were infected  
345 with LASVpv (MOI of 0.01), and the supernatant was removed 1 h post-infection.  
346 The infected cells were lysed 23 h later, and luciferase activity was measured using  
347 the Rluc assay system (Promega, Madison, WI). Primary candidates were identified  
348 using criteria of no apparent cytotoxicity and an average >50% inhibition in duplicate  
349 wells and then subsequently rescreened via serial dilution in triplicate plates to  
350 evaluate the IC<sub>50</sub> (GraphPad Prism 6). Dose-dependent inhibition and cell  
351 viability >80% were the criteria used to select 7 compounds. The 7 compounds were



352 then counter-screened using VSV<sub>pv</sub> (MOI of 0.01) to rule out VSV genome  
353 replication inhibitors and Rluc activity. Compounds specifically blocking LASV entry  
354 were considered hit drugs and were evaluated for the CC<sub>50</sub> and SI.

355 **Membrane Fusion Assay.** 293T cells transfected with pCAGGS expression plasmids  
356 for LASV GPC or the empty pCAGGS were treated with compounds or vehicle  
357 (DMSO) for 1 h, followed by incubation for 15 min with acidified (pH 5.0) medium.  
358 The cells were then washed and placed in neutral medium, and syncytium formation  
359 was visualized 1 h later via light microscopy.

360 For quantification of the luciferase-based fusion assay, 293T cells transfected with  
361 both pCAGGS-LASV GPC and plasmids expressing T7 RNA polymerase (pCAGT7)  
362 were co-cultured at a ratio of 3:1 with targeted cells transfected with pT7EMCVLuc  
363 and pRL-CMV (plasmids used in this assay were kindly provided by Yoshiharu  
364 Matsuura, Osaka University, Osaka, Japan). Drug treatment and pH induction were  
365 conducted as described above. Cell fusion activity was quantitatively determined after  
366 24 h by measuring firefly luciferase activity and was standardized with Rluc activity  
367 as previously described (27, 51).

368 **Virucidal Assay.** To study the virucidal effects of the drugs, approximately  $5 \times 10^5$   
369 copies of LASV<sub>pv</sub> or VSV<sub>pv</sub> were incubated with drugs (25  $\mu$ M) or vehicle at 37 °C  
370 for 1 h; the mixture was diluted 200-fold to the non-inhibitory concentration (MOI of  
371 0.01) to infect Vero cells. Luciferase activity was determined 24 h later as described  
372 above.

373 **Binding Assay.** Vero cells were pretreated with 50  $\mu$ M lacidipine or phenothrin; after

374 1 h the cells were transferred onto ice, and LASVpv (MOI of 10) was added for 1 h.  
375 After washed with cold PBS for 3 times, the bound viral particles were quantified via  
376 RT-qPCR using a specific primer pair to detect the VSV $\Delta$ G-Rluc (primers 5'-  
377 GTAACGGACGAATGTCTCATAA -3' and 5'- TTTGACTCTCGCCTGATTGTAC  
378 -3'). All RNA amplifications were normalized to glyceraldehyde 3-phosphate  
379 dehydrogenase (GAPDH) RNA (obtained via PCR with the following primers: 5'-  
380 TCCTTGGAGGCCATGTGGGCCAT -3' and 5'-  
381 TGATGACATCAAGAAGGTGGTGAAG -3').

382 **Time-of-Addition Assay.** We performed a time-of-addition experiment to elucidate  
383 which stage of LASV entry was inhibited by the drugs. At time 0, Vero cells were  
384 infected with LASVpv (MOI of 0.01) at 4 °C for 1 h and washed with  
385 phosphate-buffered saline; the temperature was then increased to 37°C (designated  
386 time 0 post infection [p.i.]) to synchronize the infections. Test compounds were  
387 incubated with the cells as shown in Fig. 3C.

388 **Selection of Adaptive Mutants.** Drug-resistant viruses were generated by passaging  
389 LASVrv on Vero cells in the presence of 10  $\mu$ M lacidipine or 25  $\mu$ M phenothrin.  
390 LASVrv was passaged in the presence of 2% DMSO in parallel as a control.  
391 Passaging in the presence of lacidipine was terminated when no further improvement  
392 in resistance was detected. RNA from the resistant viruses was extracted, amplified,  
393 and purified for sequencing of the GPC segment. Mutant sites were introduced to  
394 recover LASVrv as previously described (52). Virus titers and lacidipine sensitivities  
395 were determined by means of a plaque assay in Vero cells.

396

## 397 ACKNOWLEDGEMENTS

398 We thank the The Center for Instrumental Analysis and Metrology and the Core  
399 Facility and Technical Support, Wuhan Institute of Virology for providing technical  
400 assistance. This work was supported by the National Natural Sciences Foundation of  
401 China (31670165), the Open Research Fund Program of CAS Key Laboratory of  
402 Special Pathogens and Biosafety, Wuhan Institute of Virology, and the Open Research  
403 Fund Program of Wuhan National Bio-Safety Level 4 Lab of CAS (NBL2017008).

404

## 405 REFERENCES

- 406 1. **Oldstone MB.** 2002. Arenaviruses. I. The epidemiology molecular and cell biology of  
407 arenaviruses. Introduction. *Current topics in microbiology and immunology* **262**:V-XII.
- 408 2. **Nunberg JH, York J.** 2012. The curious case of arenavirus entry, and its inhibition. *Viruses*  
409 **4**:83-101.
- 410 3. **Buchmeier MJ, de la Torre JC, Peters CJ.** 2007. *Fields Virology*, 4th ed. Lippincott-Raven,  
411 Philadelphia.
- 412 4. **Vela E.** 2012. Animal models, prophylaxis, and therapeutics for arenavirus infections. *Viruses*  
413 **4**:1802-1829.
- 414 5. **Houlihan C, Behrens R.** 2017. Lassa fever. *Bmj* **358**:j2986.
- 415 6. **Maxmen A.** 2018. Deadly Lassa-fever outbreak tests Nigeria's revamped health agency.  
416 *Nature* **555**:421-422.
- 417 7. **Eichler R, Lenz O, Strecker T, Garten W.** 2003. Signal peptide of Lassa virus glycoprotein GP-C  
418 exhibits an unusual length. *FEBS letters* **538**:203-206.
- 419 8. **Wang W, Zhou Z, Zhang L, Wang S, Xiao G.** 2016. Structure-function relationship of the  
420 mammarenavirus envelope glycoprotein. *Virologica Sinica* **31**:380-394.
- 421 9. **Igonet S, Vaney MC, Vonrhein C, Bricogne G, Stura EA, Hengartner H, Eschli B, Rey FA.** 2011.  
422 X-ray structure of the arenavirus glycoprotein GP2 in its postfusion hairpin conformation.  
423 *Proceedings of the National Academy of Sciences of the United States of America*  
424 **108**:19967-19972.
- 425 10. **Lenz O, ter Meulen J, Klenk HD, Seidah NG, Garten W.** 2001. The Lassa virus glycoprotein  
426 precursor GP-C is proteolytically processed by subtilase SKI-1/S1P. *Proceedings of the*  
427 *National Academy of Sciences of the United States of America* **98**:12701-12705.
- 428 11. **York J, Nunberg JH.** 2009. Intersubunit interactions modulate pH-induced activation of  
429 membrane fusion by the Junin virus envelope glycoprotein GPC. *Journal of virology*

- 430 **83:4121-4126.**
- 431 12. **Saunders AA, Ting JP, Meisner J, Neuman BW, Perez M, de la Torre JC, Buchmeier MJ.** 2007.  
432 Mapping the landscape of the lymphocytic choriomeningitis virus stable signal peptide  
433 reveals novel functional domains. *Journal of virology* **81:5649-5657.**
- 434 13. **Eichler R, Lenz O, Strecker T, Eickmann M, Klenk HD, Garten W.** 2004. Lassa virus  
435 glycoprotein signal peptide displays a novel topology with an extended endoplasmic  
436 reticulum luminal region. *The Journal of biological chemistry* **279:12293-12299.**
- 437 14. **Eichler R, Lenz O, Strecker T, Eickmann M, Klenk HD, Garten W.** 2003. Identification of Lassa  
438 virus glycoprotein signal peptide as a trans-acting maturation factor. *EMBO reports*  
439 **4:1084-1088.**
- 440 15. **Froeschke M, Basler M, Groettrup M, Dobberstein B.** 2003. Long-lived signal peptide of  
441 lymphocytic choriomeningitis virus glycoprotein pGP-C. *The Journal of biological chemistry*  
442 **278:41914-41920.**
- 443 16. **Agnihothram SS, York J, Trahey M, Nunberg JH.** 2007. Bitopic membrane topology of the  
444 stable signal peptide in the tripartite Junin virus GP-C envelope glycoprotein complex. *Journal*  
445 *of virology* **81:4331-4337.**
- 446 17. **Schrempf S, Froeschke M, Girolglou T, von Laer D, Dobberstein B.** 2007. Signal peptide  
447 requirements for lymphocytic choriomeningitis virus glycoprotein C maturation and virus  
448 infectivity. *Journal of virology* **81:12515-12524.**
- 449 18. **Cao W, Henry MD, Borrow P, Yamada H, Elder JH, Ravkov EV, Nichol ST, Compans RW,**  
450 **Campbell KP, Oldstone MB.** 1998. Identification of alpha-dystroglycan as a receptor for  
451 lymphocytic choriomeningitis virus and Lassa fever virus. *Science* **282:2079-2081.**
- 452 19. **Kunz S, Rojek JM, Perez M, Spiropoulou CF, Oldstone MB.** 2005. Characterization of the  
453 interaction of lassa fever virus with its cellular receptor alpha-dystroglycan. *Journal of*  
454 *virology* **79:5979-5987.**
- 455 20. **Jae LT, Raaben M, Herbert AS, Kuehne AI, Wirchnianski AS, Soh TK, Stubbs SH, Janssen H,**  
456 **Damme M, Saftig P, Whelan SP, Dye JM, Brummelkamp TR.** 2014. Lassa virus entry requires  
457 a trigger-induced receptor switch. *Science* **344:1506-1510.**
- 458 21. **McCormick JB, King IJ, Webb PA, Scribner CL, Craven RB, Johnson KM, Elliott LH,**  
459 **Belmont-Williams R.** 1986. Lassa fever. Effective therapy with ribavirin. *The New England*  
460 *journal of medicine* **314:20-26.**
- 461 22. **Wang S, Liu Y, Guo J, Wang P, Zhang L, Xiao G, Wang W.** 2017. Screening of FDA-Approved  
462 Drugs for Inhibitors of Japanese Encephalitis Virus Infection. *Journal of virology*  
463 **91:e01055-01017.**
- 464 23. **Chong CR, Sullivan DJ, Jr.** 2007. New uses for old drugs. *Nature* **448:645-646.**
- 465 24. **Garbutt M, Liebscher R, Wahl-Jensen V, Jones S, Moller P, Wagner R, Volchkov V, Klenk HD,**  
466 **Feldmann H, Stroher U.** 2004. Properties of replication-competent vesicular stomatitis virus  
467 vectors expressing glycoproteins of filoviruses and arenaviruses. *Journal of virology*  
468 **78:5458-5465.**
- 469 25. **Nagy K, Racz G, Matsumoto T, Adany R, Adam B.** 2014. Evaluation of the genotoxicity of the  
470 pyrethroid insecticide phenothrin. *Mutation research. Genetic toxicology and environmental*  
471 *mutagenesis* **770:1-5.**
- 472 26. **York J, Dai D, Amberg SM, Nunberg JH.** 2008. pH-induced activation of arenavirus membrane  
473 fusion is antagonized by small-molecule inhibitors. *Journal of virology* **82:10932-10939.**

- 474 27. **Thomas CJ, Casquilho-Gray HE, York J, DeCamp DL, Dai D, Petrilli EB, Boger DL, Slayden RA,**  
475 **Amberg SM, Sprang SR, Nunberg JH.** 2011. A specific interaction of small molecule entry  
476 inhibitors with the envelope glycoprotein complex of the Junin hemorrhagic fever arenavirus.  
477 *The Journal of biological chemistry* **286**:6192-6200.
- 478 28. **Shankar S, Whitby LR, Casquilho-Gray HE, York J, Boger DL, Nunberg JH.** 2016.  
479 Small-molecule fusion inhibitors bind the pH-sensing SSP-GP2 subunit interface of the Lassa  
480 virus envelope glycoprotein. *Journal of virology*.
- 481 29. **Rathbun JY, Droniou ME, Damoiseaux R, Haworth KG, Henley JE, Exline CM, Choe H, Cannon**  
482 **PM.** 2015. Novel Arenavirus Entry Inhibitors Discovered by Using a Minigenome Rescue  
483 System for High-Throughput Drug Screening. *Journal of virology* **89**:8428-8443.
- 484 30. **Moraz ML, Pythoud C, Turk R, Rothenberger S, Pasquato A, Campbell KP, Kunz S.** 2013. Cell  
485 entry of Lassa virus induces tyrosine phosphorylation of dystroglycan. *Cellular microbiology*  
486 **15**:689-700.
- 487 31. **Oppliger J, Torriani G, Herrador A, Kunz S.** 2016. Lassa virus cell entry via dystroglycan  
488 involves an unusual pathway of macropinocytosis. *Journal of virology*.
- 489 32. **Bederka LH, Bonhomme CJ, Ling EL, Buchmeier MJ.** 2014. Arenavirus stable signal peptide is  
490 the keystone subunit for glycoprotein complex organization. *mBio* **5**:e02063.
- 491 33. **Larson RA, Dai D, Hosack VT, Tan Y, Bolken TC, Hruby DE, Amberg SM.** 2008. Identification of  
492 a broad-spectrum arenavirus entry inhibitor. *Journal of virology* **82**:10768-10775.
- 493 34. **Shankar S, Whitby LR, Casquilho-Gray HE, York J, Boger DL, Nunberg JH.** 2016.  
494 Small-Molecule Fusion Inhibitors Bind the pH-Sensing Stable Signal Peptide-GP2 Subunit  
495 Interface of the Lassa Virus Envelope Glycoprotein. *Journal of virology* **90**:6799-6807.
- 496 35. **Albarino CG, Bird BH, Chakrabarti AK, Dodd KA, White DM, Bergeron E, Shrivastava-Ranjan**  
497 **P, Nichol ST.** 2011. Reverse genetics generation of chimeric infectious Junin/Lassa virus is  
498 dependent on interaction of homologous glycoprotein stable signal peptide and G2  
499 cytoplasmic domains. *Journal of virology* **85**:112-122.
- 500 36. **Messina EL, York J, Nunberg JH.** 2012. Dissection of the role of the stable signal peptide of  
501 the arenavirus envelope glycoprotein in membrane fusion. *Journal of virology* **86**:6138-6145.
- 502 37. **Burri DJ, Pasquato A, da Palma JR, Igonet S, Oldstone MB, Kunz S.** 2013. The role of  
503 proteolytic processing and the stable signal peptide in expression of the Old World arenavirus  
504 envelope glycoprotein ectodomain. *Virology* **436**:127-133.
- 505 38. **Shao J, Liu X, Ly H, Liang Y.** 2016. Characterization of the glycoprotein stable signal peptide in  
506 mediating Pichinde viral replication and virulence. *Journal of virology*.
- 507 39. **Briknarova K, Thomas CJ, York J, Nunberg JH.** 2011. Structure of a zinc-binding domain in the  
508 Junin virus envelope glycoprotein. *The Journal of biological chemistry* **286**:1528-1536.
- 509 40. **Lee AM, Rojek JM, Spiropoulou CF, Gundersen AT, Jin W, Shaginian A, York J, Nunberg JH,**  
510 **Boger DL, Oldstone MB, Kunz S.** 2008. Unique small molecule entry inhibitors of  
511 hemorrhagic fever arenaviruses. *The Journal of biological chemistry* **283**:18734-18742.
- 512 41. **York J, Nunberg JH.** 2006. Role of the stable signal peptide of Junin arenavirus envelope  
513 glycoprotein in pH-dependent membrane fusion. *Journal of virology* **80**:7775-7780.
- 514 42. **Hastie KM, Zandonatti MA, Kleinfelter LM, Heinrich ML, Rowland MM, Chandran K, Branco**  
515 **LM, Robinson JE, Garry RF, Saphire EO.** 2017. Structural basis for antibody-mediated  
516 neutralization of Lassa virus. *Science* **356**:923-928.
- 517 43. **Hastie KM, Igonet S, Sullivan BM, Legrand P, Zandonatti MA, Robinson JE, Garry RF, Rey FA,**

- 518 **Oldstone MB, Saphire EO.** 2016. Crystal structure of the prefusion surface glycoprotein of the  
519 prototypic arenavirus LCMV. *Nature structural & molecular biology*.
- 520 44. **Burgeson JR, Gharaibeh DN, Moore AL, Larson RA, Amberg SM, Bolken TC, Hruby DE, Dai D.**  
521 2013. Lead optimization of an acylhydrazone scaffold possessing antiviral activity against  
522 Lassa virus. *Bioorganic & medicinal chemistry letters* **23**:5840-5843.
- 523 45. **Tani H, Shiokawa M, Kaname Y, Kambara H, Mori Y, Abe T, Moriishi K, Matsuura Y.** 2010.  
524 Involvement of ceramide in the propagation of Japanese encephalitis virus. *J Virol*  
525 **84**:2798-2807.
- 526 46. **Zhang LK, Xin QL, Zhu SL, Wan WW, Wang W, Xiao G.** 2016. Activation of the RLR/MAVS  
527 signaling pathway by the L protein of Mopeia virus. *Journal of virology*.
- 528 47. **Whitt MA.** 2010. Generation of VSV pseudotypes using recombinant DeltaG-VSV for studies  
529 on virus entry, identification of entry inhibitors, and immune responses to vaccines. *Journal*  
530 *of virological methods* **169**:365-374.
- 531 48. **Geisbert TW, Jones S, Fritz EA, Shurtleff AC, Geisbert JB, Liebscher R, Grolla A, Stroher U,**  
532 **Fernando L, Daddario KM, Guttieri MC, Mothe BR, Larsen T, Hensley LE, Jahrling PB,**  
533 **Feldmann H.** 2005. Development of a new vaccine for the prevention of Lassa fever. *PLoS*  
534 *medicine* **2**:e183.
- 535 49. **Safronetz D, Mire C, Rosenke K, Feldmann F, Haddock E, Geisbert T, Feldmann H.** 2015. A  
536 recombinant vesicular stomatitis virus-based Lassa fever vaccine protects guinea pigs and  
537 macaques against challenge with geographically and genetically distinct Lassa viruses. *PLoS*  
538 *neglected tropical diseases* **9**:e0003736.
- 539 50. **Anantpadma M, Kouznetsova J, Wang H, Huang R, Kolokoltsov A, Guha R, Lindstrom AR,**  
540 **Shtanko O, Simeonov A, Maloney DJ, Maury W, LaCount DJ, Jadhav A, Davey RA.** 2016.  
541 Large-Scale Screening and Identification of Novel Ebola Virus and Marburg Virus Entry  
542 Inhibitors. *Antimicrobial agents and chemotherapy* **60**:4471-4481.
- 543 51. **Takikawa S, Ishii K, Aizaki H, Suzuki T, Asakura H, Matsuura Y, Miyamura T.** 2000. Cell fusion  
544 activity of hepatitis C virus envelope proteins. *Journal of virology* **74**:5066-5074.
- 545 52. **Liu H, Liu Y, Wang S, Zhang Y, Zu X, Zhou Z, Zhang B, Xiao G.** 2015. Structure-based  
546 mutational analysis of several sites in the E protein: implications for understanding the entry  
547 mechanism of Japanese encephalitis virus. *J Virol* **89**:5668-5686.

548

549

## 550 FIGURE LEGENDS

551 Fig 1 High throughput screening (HTS) for inhibitors of Lassa virus (LASV) entry  
552 from a Food and Drug Administration (FDA)-approved drug library. (A) The HTS  
553 assay flowchart is shown. (B) A counter-screening of the 7 selected compounds to  
554 reconfirm the initial screening results is shown. Vero cells were seeded at a density of

555  $1 \times 10^4$  cells per well in 96-well plates. After incubating overnight, cells were treated in  
556 duplicate with compounds (25  $\mu$ M); pseudo-type LASV (LASVpv) was added 1 h  
557 later, with a multiplicity of infection (MOI) of 0.01. The supernatant was removed  
558 after 1 h, and the cells were re-treated with the compounds for an additional 23 h. (C  
559 and D) Dose-response curves of lacidipine (C) and phenothrin (D) for inhibiting  
560 LASVpv infection are shown; the insets in each graph shown the drug structures. (E)  
561 The 50% inhibitory concentration ( $IC_{50}$ ), 50% cytotoxic concentration ( $CC_{50}$ ), and  
562 selective index (SI) for lacidipine and phenothrin are shown. *Rluc*, Renilla luciferase;  
563 VSVrv, recombinant vesicular stomatitis virus; VSVg, pseudo-type vesicular  
564 stomatitis virus;  $IC_{50}$ , 50% inhibitory concentration;  $CC_{50}$ , 50% cytotoxic  
565 concentration; SI, selective index

566

567 Fig 2 Lacidipine and phenothrin inhibit glycoprotein complex (GPC)-mediated  
568 membrane fusion. (A) 293T cells were transfected with pCAGGS-Lassa virus (LASV)  
569 GPC or the empty pCAGGS expression plasmid; 24 h later the drugs or vehicle  
570 (dimethyl sulfoxide, DMSO) were added for 1 h followed by treatment with acidified  
571 (pH 5.0) Dulbecco's modified Eagle's medium (DMEM) for 15 min. The cells were  
572 then washed and placed in neutral pH DMEM. Syncytium formation was visualized  
573 after 3 h using light microscopy. Images are representative fields from 4 to 5  
574 independent experiments. (B) A dual luciferase assay was used to quantitatively  
575 evaluate the inhibitory activities of lacidipine and phenothrin against membrane  
576 fusion. 293T cells transfected with both pCAGGS-LASV GPC and plasmid

577 expressing pCAGT7 were co-cultured at a ratio of 1:3 with targeted cells transfected  
578 with pT7EMCVLuc together with the pRL-CMV control vector. The cell fusion  
579 activity was quantitatively determined by measuring firefly luciferase activity and  
580 standardized with *Renilla* luciferase (Rluc) activity. Data are presented as means  $\pm$   
581 SDs for 3 independent experiments.

582

583 Fig 3 Effects of lacidipine and phenothrin on different stages of Lassa virus (LASV)  
584 entry. (A) Results of a virucidal assay are shown. (Left) Pseudo-type LASVs  
585 (LASVpv) with a multiplicity of infection (MOI) of 2 were incubated with dimethyl  
586 sulfoxide (DMSO) or drugs (25  $\mu$ M for 1 h) and then diluted 200-fold and added to  
587 cells. (Middle) Cells were incubated with DMSO or drugs for 1 h at 0.125  $\mu$ M before  
588 adding LASVpv (MOI of 0.01). (Right) The pseudo-type vesicular stomatitis virus  
589 (VSVpv, MOI of 2) was incubated with DMSO or drug (25  $\mu$ M for 1 h) and then  
590 diluted 200-fold before adding to the cells; luciferase activity was determined 24 h  
591 later. (B) The effects of drugs on LASVpv binding are shown. Vero cells were  
592 incubated with drugs (50  $\mu$ M) or vehicle at 37 °C for 1 h, followed by incubation with  
593 LASVpv (MOI of 10) in the presence or absence of drugs at 4 °C for an additional 1 h.  
594 After extensively washing with cold phosphate-buffered saline (PBS), the bound virus  
595 was quantified via RT-qPCR. (C) Vero cells were infected with LASVpv (MOI of  
596 0.01) at 4 °C for 1 h and then washed with PBS; the temperature was then increased  
597 to 37°C in the presence of lacidipine (10  $\mu$ M) or phenothrin (25  $\mu$ M) for the indicated  
598 times. Data are presented as the means  $\pm$  SDs for 4 independent experiments. GAPDH,



599 glyceraldehyde 3-phosphate dehydrogenase, \*\*  $P < 0.01$ .

600

601 Fig 4 Selection and characterization of lacidipine-resistant recombinant Lassa virus  
602 (LASVrv). (A) The adaptive mutant virus was selected by serially passaging LASVrv  
603 in the presence of 10  $\mu$ M lacidipine. In a parallel experiment, LASVrv passaging in  
604 vehicle served as a control. After 12 rounds of passaging, no further improvement in  
605 resistance was detected, and the selection was terminated. Virus titers and lacidipine  
606 sensitivities were determined via a plaque assay in Vero cells. (B) (Top) Membrane  
607 topology of LASV stable-signal peptide (SSP) with the threonine 40 (T40) location  
608 highlighted is shown (8). (Bottom) The amino acid sequence alignment of the  
609 mammarenavirus SSP is shown. The GenBank accession numbers are listed in  
610 Materials and Methods. (C) (Top) A sequencing chromatogram of the wild type (WT)  
611 and recombinant viruses with plaque morphology of each virus as an inset is shown.  
612 (Right bottom) Growth kinetics of the recombinant viruses with different T40  
613 mutations are shown. Vero cells were infected with a multiplicity of infection (MOI)  
614 of 0.1 for 1 h. The supernatants were collected at indicated time points post-infection  
615 and assayed for the viral titer. Data are presented as means  $\pm$  SD from 2 independent  
616 wells. (D) Resistant activity of the recombinant viruses to lacidipine is shown. Data  
617 are presented as means  $\pm$  SD from 2 independent experiments. GTOV, Guanarito  
618 virus; JUNV, Junín virus, MACV, Machupo virus, SABV Sabiá virus; CHPV,  
619 Chandipura virus; LCMV, lymphocytic choriomeningitis virus; LUJV, Lujo virus;  
620 MOPV, Mopeia virus; LASV, Lassa virus; PFU, plaque forming units; FFU,

621 focus-forming units

622

623 Fig 5 Broad spectrum antiviral activity of the hit drugs against different

624 mammarenavirus and filovirus. Vero cells were incubated in the absence and presence

625 of lacidipine (A) or phenothrin (B). After 1 h, a pseudo-type of the Guaranito virus

626 (GTOV), Junín virus (JUNV), Machupo virus (MACV), Sabiá virus (SABV),

627 Chandipura virus (CHPV), lymphocytic choriomeningitis virus (LCMV), Lujo virus,

628 Mopeia virus (MOPV), Ebola virus (EBOV), and Marburg virus (MARV) were added.

629 The supernatant was removed 1 h later and the cell lysates were assessed for

630 luciferase activity after 23 h. Data are presented as means  $\pm$  SD from 5 independent

631 experiments. NW, new world; OW, old world

632

633 Fig 6 Selection of lacidipine-resistant recombinant Guaranito virus (GTOVrv). (A)

634 The adaptive mutant virus was selected by serially passaging GTOVrv in the presence

635 of 10  $\mu$ M lacidipine. GTOVrv passaging in vehicle served as a control in parallel.

636 After 15 rounds of passaging, no further improvement in resistance was detected and

637 the selection was terminated. Virus titers and lacidipine sensitivities were determined

638 via plaque assay in Vero cells. (B) Resistant activity of the recombinant viruses to

639 lacidipine is shown. Data are presented as means  $\pm$  SD from 2 independent

640 experiments. DMSO, dimethyl sulfoxide; WT, wild type; FFU, focus forming units.

A

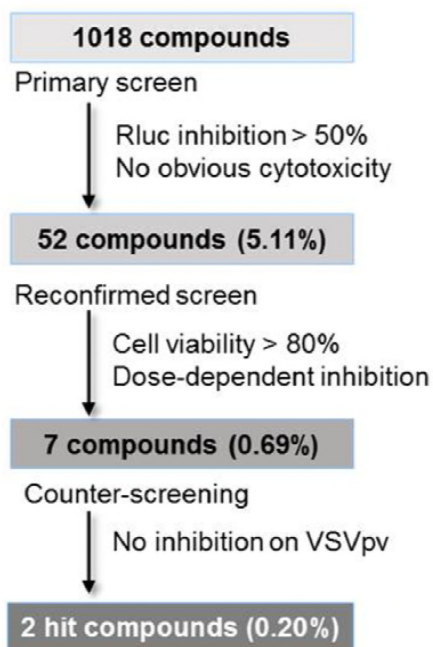

B

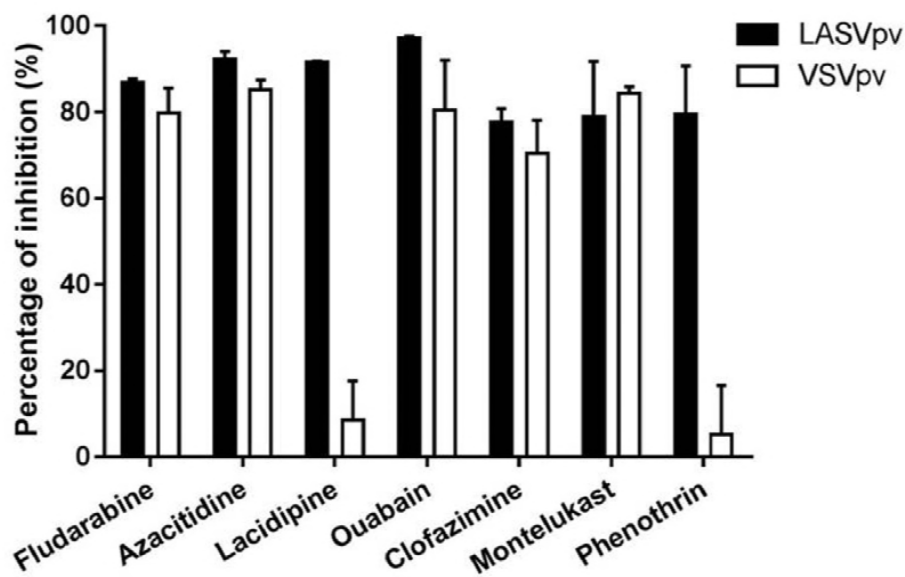

C

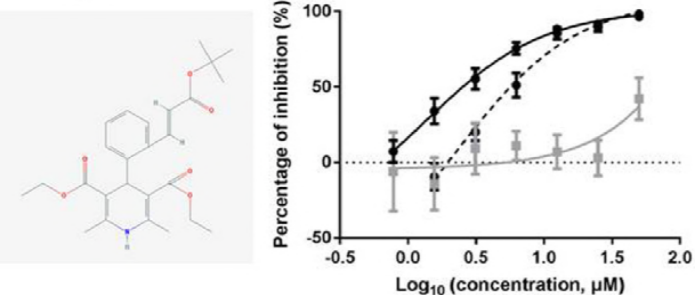

D

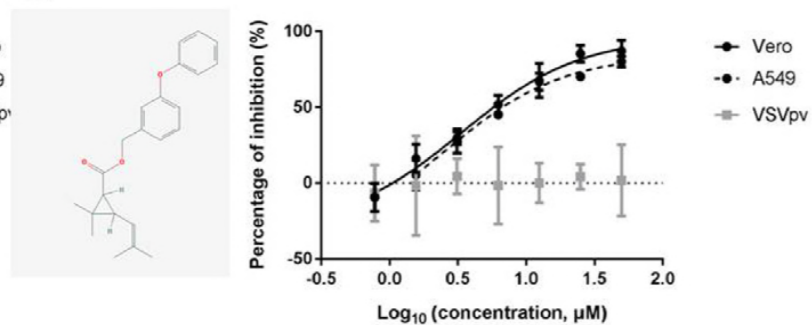

E

| Hit compounds | IC <sub>50</sub> (μM) <sup>a</sup> | CC <sub>50</sub> (μM) | SI     |
|---------------|------------------------------------|-----------------------|--------|
| lacidipine    | 2.6                                | 144                   | 55.4   |
| phenothrin    | 5.3                                | > 400                 | > 75.5 |

<sup>a</sup> determined in Vero cells

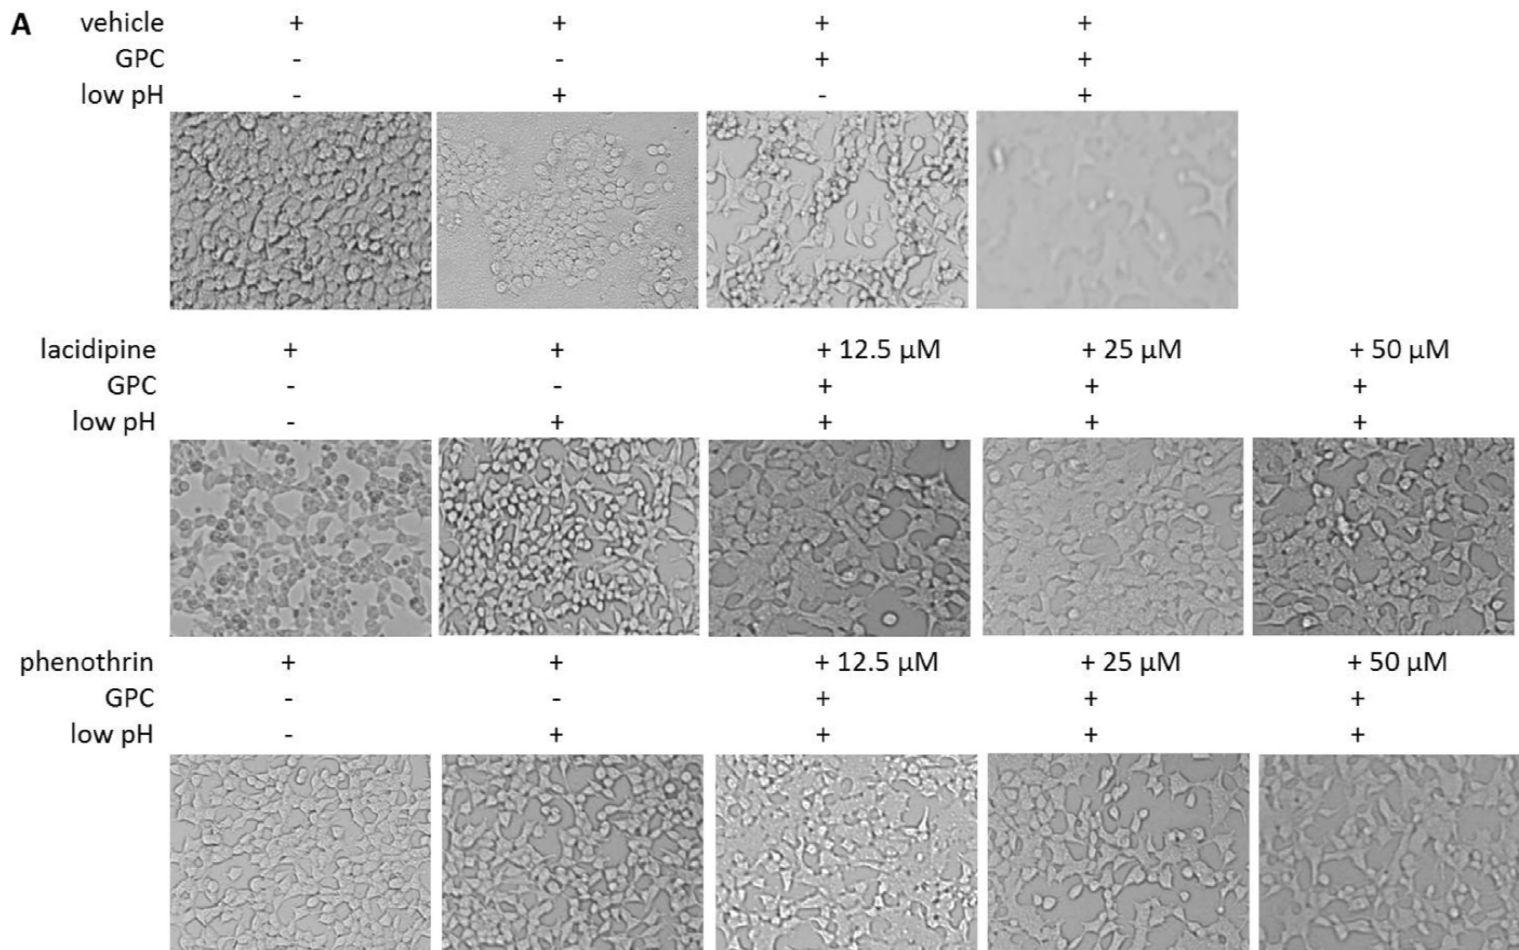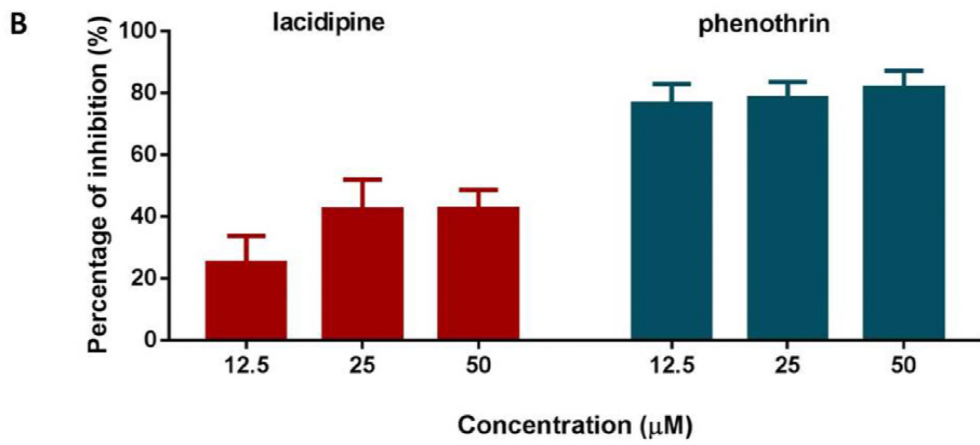

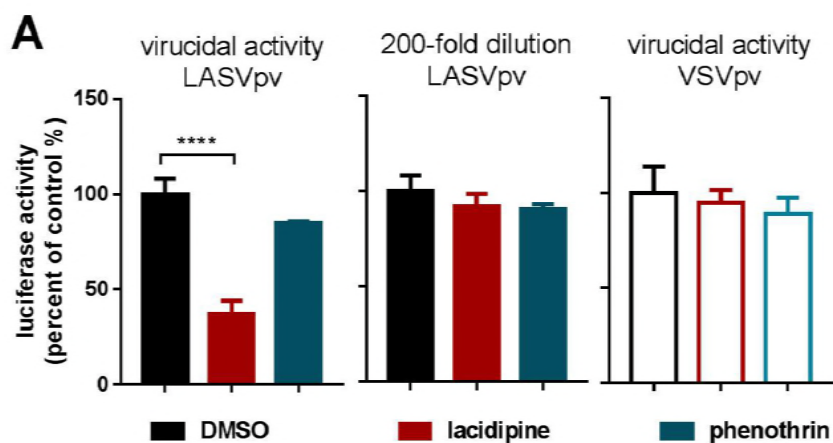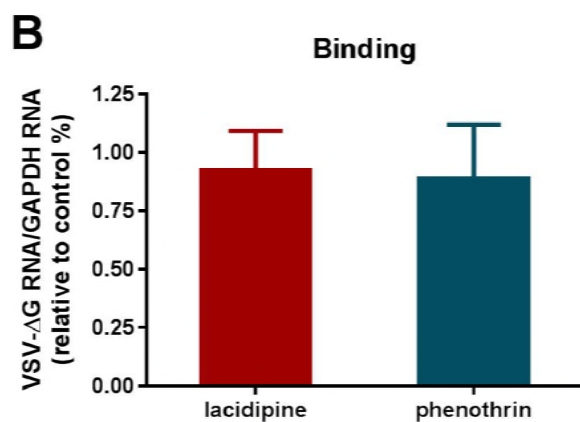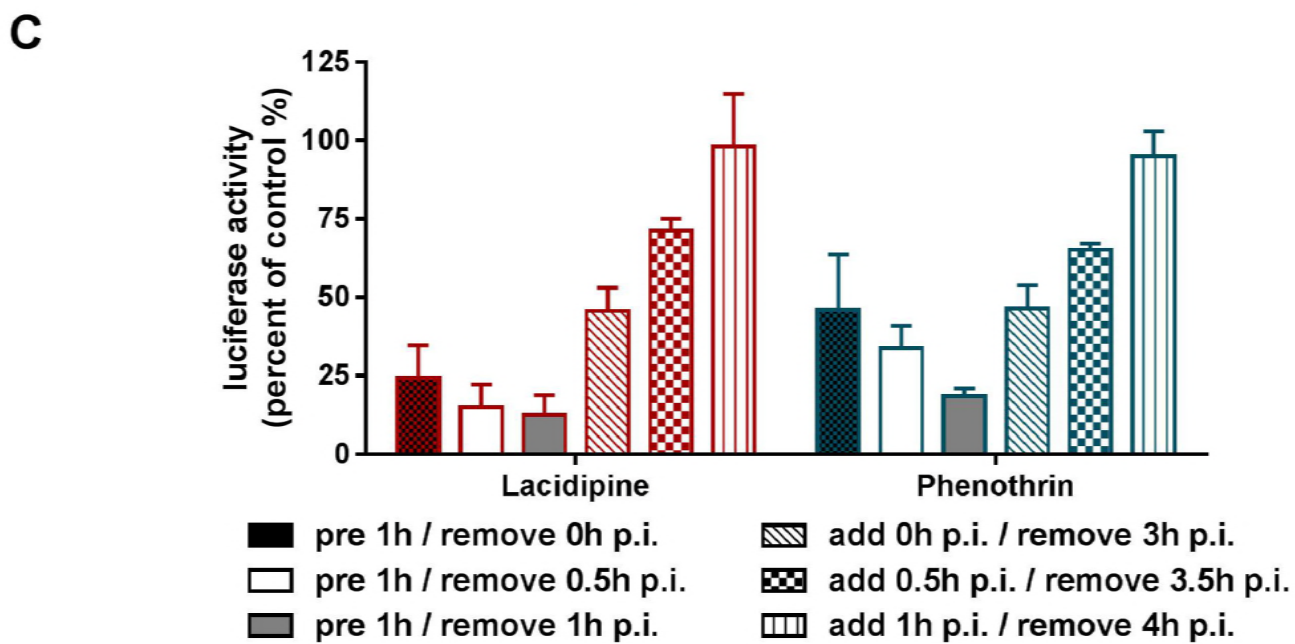

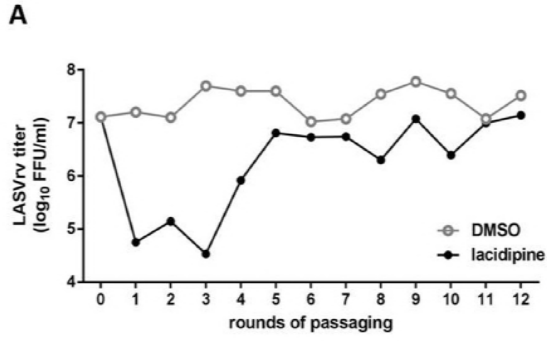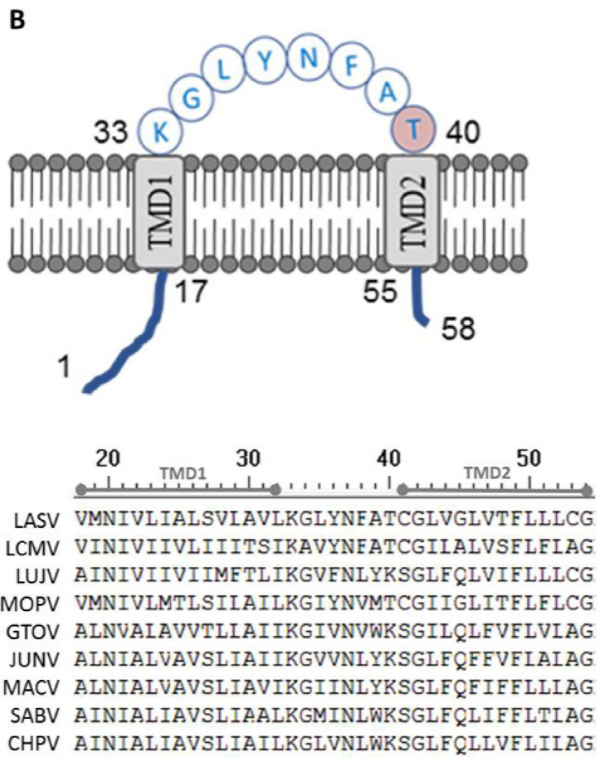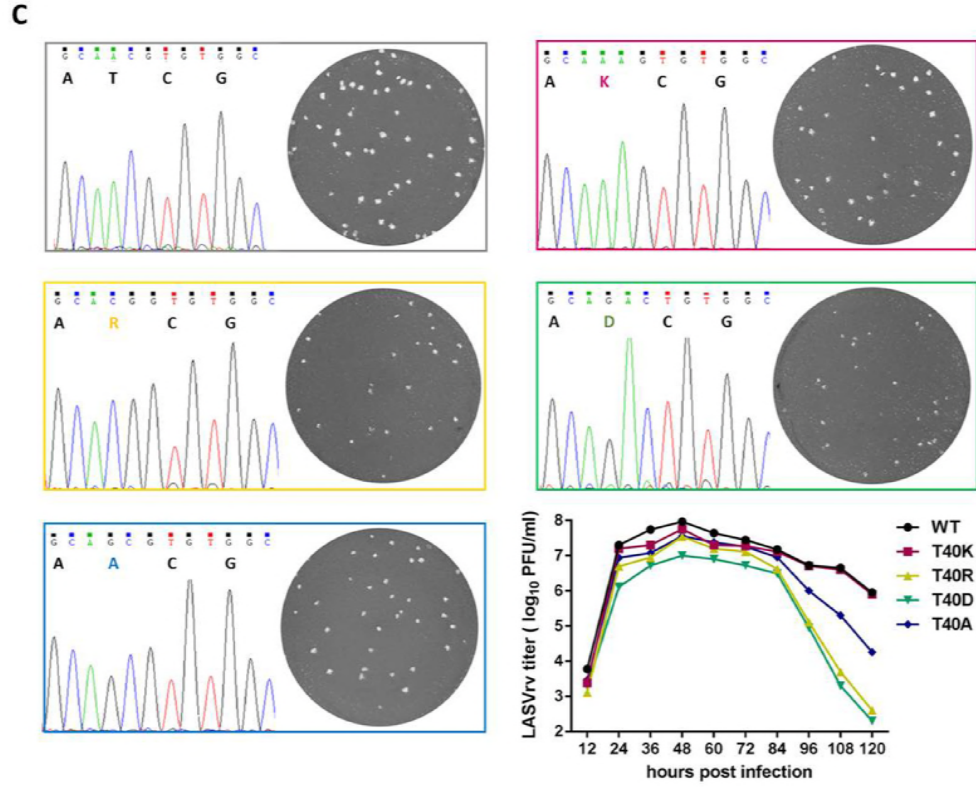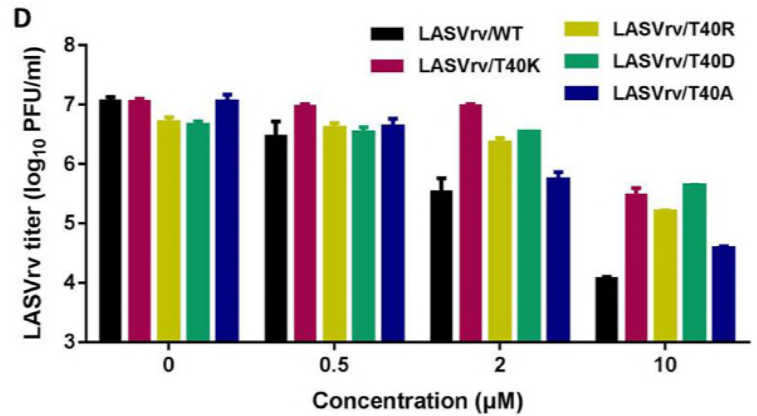

**A****lacidipine****NW**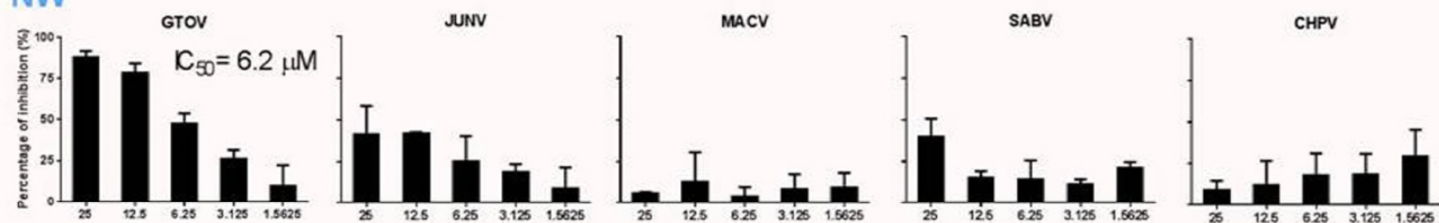**OW**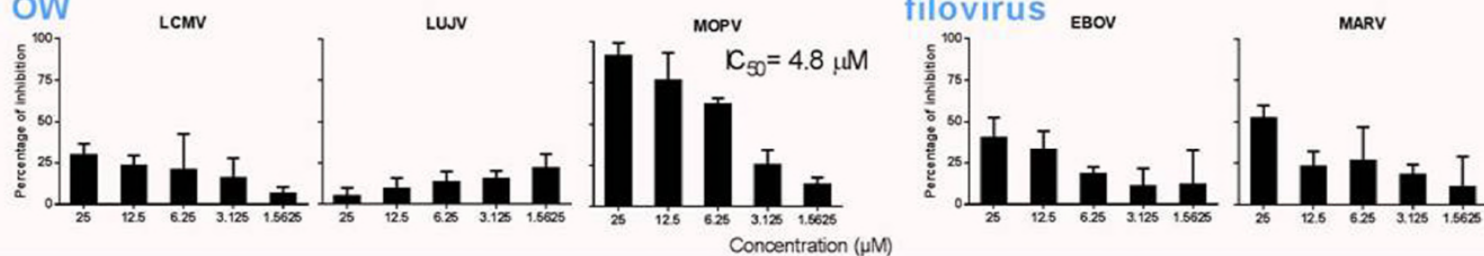**B****phenothrin****NW**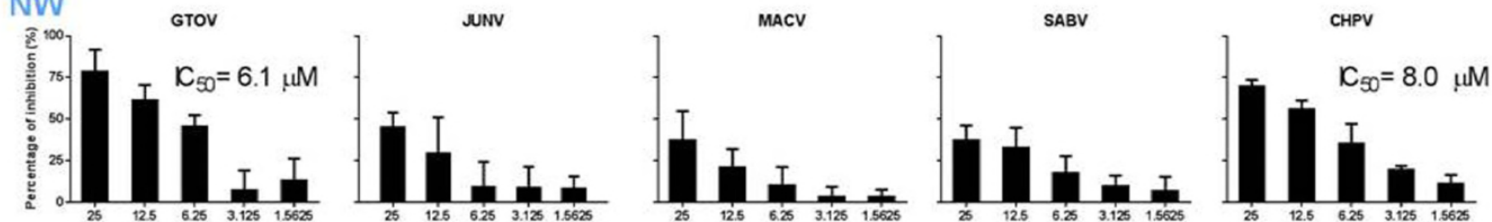**OW**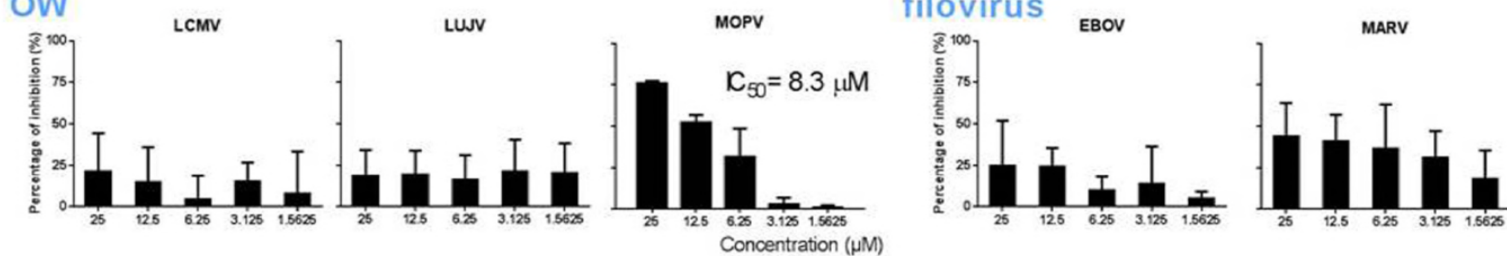

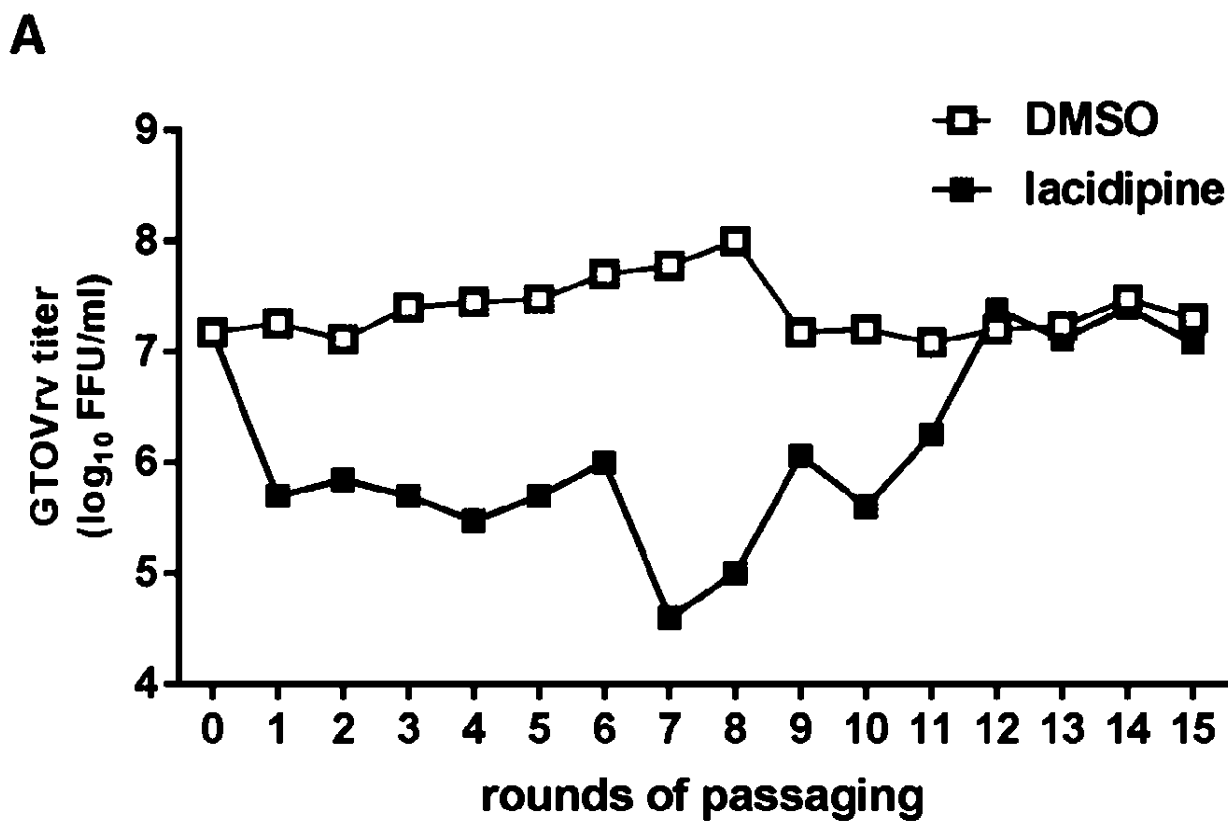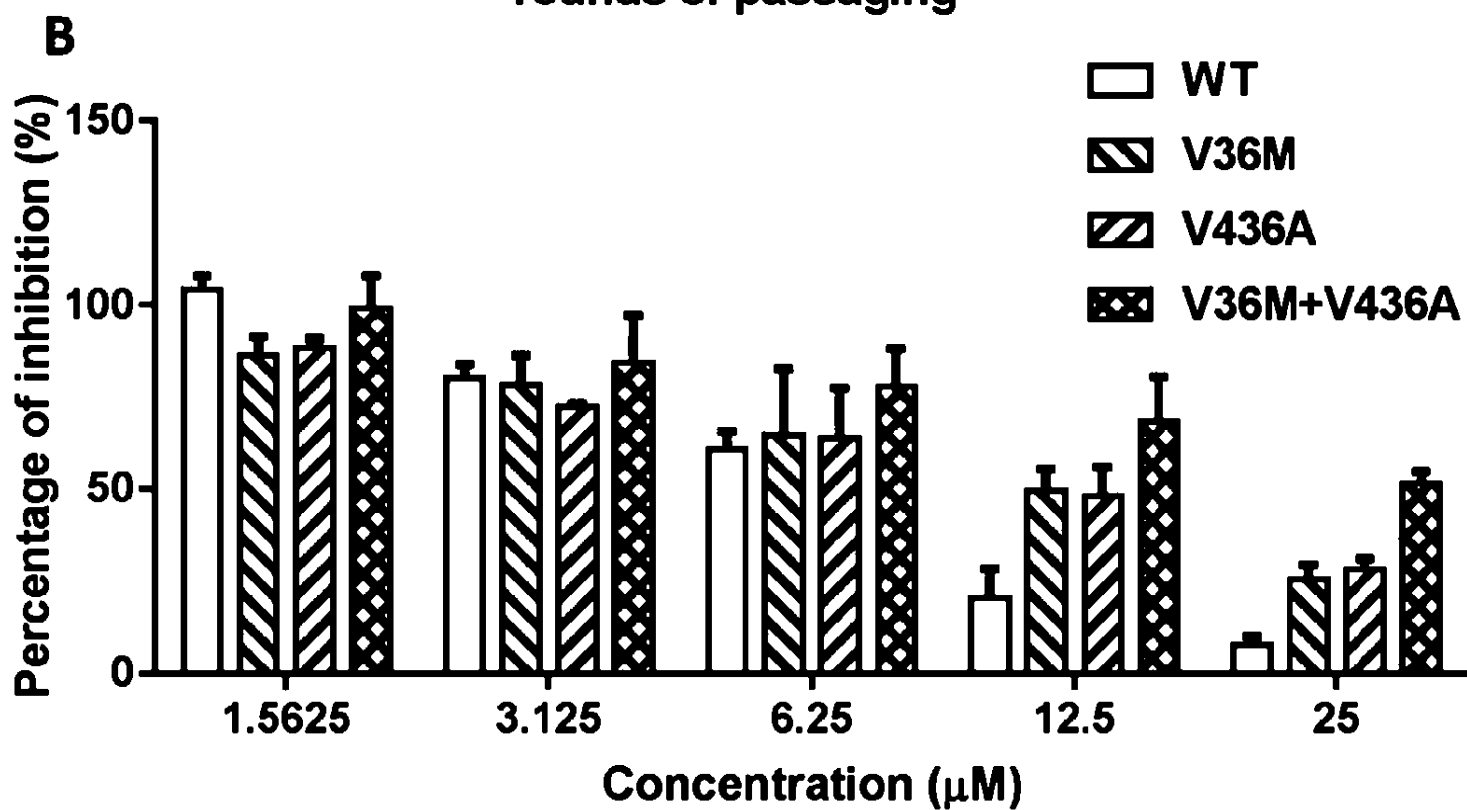

Source: https://www.biorxiv.org/content/10.1101/298463v1.full.pdf
